# Supplementary material for: Physical mapping of a new powdery mildew resistance locus from Thinopyrum ponticum chromosome 4AgS
Source: Front Plant Sci. 2023 Feb 23;14:1131205. doi: 10.3389/fpls.2023.1131205 (PMC9995812; doi:10.3389/fpls.2023.1131205)
Supplement: Supplementary file 1 [file Table_1.xlsx]

## Sheet: Sheet1
Supplementary Table 1 Alignment results of 81 SLAFs to Th. elongatum genome using Bowtie2
SLAFs	Chromosomes	Positions (bp)	Mapping Qualities
SLAF106131F	GWHABKY00000001	504569620	17
SLAF106131R	GWHABKY00000001	504569620	0
SLAF72728F	GWHABKY00000001	219579895	42
SLAF72728R	GWHABKY00000001	219580224	42
SLAF114903F	GWHABKY00000001	469681730	0
SLAF114903R	GWHABKY00000001	469681730	0
SLAF119736F	GWHABKY00000001	354319149	0
SLAF119736R	GWHABKY00000001	354319149	0
SLAF150265F	GWHABKY00000001	332824032	15
SLAF150265R	GWHABKY00000001	332824347	6
SLAF710503F	GWHABKY00000001	240887304	0
SLAF710503R	GWHABKY00000001	240887304	0
SLAF110184F	GWHABKY00000002	274580227	8
SLAF110184R	GWHABKY00000002	274580227	0
SLAF45082F	GWHABKY00000002	460372647	24
SLAF45082R	GWHABKY00000002	460372993	24
SLAF342597F	GWHABKY00000002	380502085	0
SLAF342597R	GWHABKY00000002	380502085	0
SLAF168493F	GWHABKY00000002	681966676	0
SLAF168493R	GWHABKY00000002	681966676	0
SLAF150694F	GWHABKY00000002	107387257	6
SLAF150694R	GWHABKY00000002	107387257	0
SLAF519767F	GWHABKY00000003	648951966	0
SLAF519767R	GWHABKY00000003	648951966	0
SLAF94857F	GWHABKY00000003	309605527	0
SLAF94857R	GWHABKY00000003	309605527	0
SLAF125490F	GWHABKY00000003	160927500	1
SLAF125490R	GWHABKY00000003	160927500	0
SLAF145482F	GWHABKY00000003	60674451	6
SLAF145482R	GWHABKY00000003	60674735	1
SLAF134846F	GWHABKY00000003	669335683	2
SLAF134846R	GWHABKY00000003	669335683	0
SLAF675474F	GWHABKY00000003	182315323	0
SLAF675474R	GWHABKY00000003	182315323	0
SLAF1149712F	GWHABKY00000003	9312239	3
SLAF1149712R	GWHABKY00000003	9312239	0
SLAF94313F	GWHABKY00000004	119814017	24
SLAF94313R	GWHABKY00000004	119814361	24
SLAF688191F	GWHABKY00000004	123504289	0
SLAF688191R	GWHABKY00000004	123504289	0
SLAF107099F	GWHABKY00000004	111133367	23
SLAF107099R	GWHABKY00000004	111133367	0
SLAF572816F	GWHABKY00000004	105787006	0
SLAF572816R	GWHABKY00000004	105787006	0
SLAF6859F	GWHABKY00000004	2700233	23
SLAF6859R	GWHABKY00000004	2700233	0
SLAF53934F	GWHABKY00000004	7797930	40
SLAF53934R	GWHABKY00000004	7797604	40
SLAF41610F	GWHABKY00000004	2944199	23
SLAF41610R	GWHABKY00000004	2943858	23
SLAF45449F	GWHABKY00000004	609777819	2
SLAF45449R	GWHABKY00000004	609777819	0
SLAF54282F	GWHABKY00000004	505684	2
SLAF54282R	GWHABKY00000004	505340	23
SLAF24653F	GWHABKY00000004	3206189	0
SLAF24653R	GWHABKY00000004	3206189	0
SLAF84409F	GWHABKY00000004	36929063	40
SLAF84409R	GWHABKY00000004	36928709	11
SLAF30827F	GWHABKY00000004	923833	3
SLAF30827R	GWHABKY00000004	923833	0
SLAF55680F	GWHABKY00000004	2805070	40
SLAF55680R	GWHABKY00000004	2804717	40
SLAF79404F	GWHABKY00000004	13763223	39
SLAF79404R	GWHABKY00000004	13762878	6
SLAF70892F	GWHABKY00000004	81429831	23
SLAF70892R	GWHABKY00000004	81429831	0
SLAF64278F	GWHABKY00000004	62744607	0
SLAF64278R	GWHABKY00000004	62744607	0
SLAF75282F	GWHABKY00000004	8301558	42
SLAF75282R	GWHABKY00000004	8301212	42
SLAF89558F	GWHABKY00000004	25067100	0
SLAF89558R	GWHABKY00000004	25067100	0
SLAF494415F	GWHABKY00000004	60149322	0
SLAF494415R	GWHABKY00000004	60149322	0
SLAF613083F	GWHABKY00000004	20100289	23
SLAF613083R	GWHABKY00000004	20100289	0
SLAF498363F	GWHABKY00000004	38953455	4
SLAF498363R	GWHABKY00000004	38953455	0
SLAF142363F	GWHABKY00000004	2953189	23
SLAF142363R	GWHABKY00000004	2953486	23
SLAF263352F	GWHABKY00000004	40728867	0
SLAF263352R	GWHABKY00000004	40728867	0
SLAF165213F	GWHABKY00000004	2961972	23
SLAF165213R	GWHABKY00000004	2961752	23
SLAF161688F	GWHABKY00000004	2779683	40
SLAF161688R	GWHABKY00000004	2779997	40
SLAF166059F	GWHABKY00000004	13903827	42
SLAF166059R	GWHABKY00000004	13904156	42
SLAF179028F	GWHABKY00000004	8061662	0
SLAF179028R	GWHABKY00000004	8061662	0
SLAF247771F	GWHABKY00000004	4523197	3
SLAF247771R	GWHABKY00000004	4523197	0
SLAF1095025F	GWHABKY00000004	2736908	0
SLAF1095025R	GWHABKY00000004	2737277	0
SLAF814136F	GWHABKY00000004	16682815	42
SLAF814136R	GWHABKY00000004	16682495	42
SLAF743059F	GWHABKY00000004	22151241	23
SLAF743059R	GWHABKY00000004	22150875	23
SLAF536380F	GWHABKY00000004	13336582	40
SLAF536380R	GWHABKY00000004	13336254	40
SLAF435829F	GWHABKY00000004	3668425	42
SLAF435829R	GWHABKY00000004	3668787	42
SLAF575090F	GWHABKY00000004	48539276	40
SLAF575090R	GWHABKY00000004	48539276	0
SLAF734214F	GWHABKY00000004	3600735	0
SLAF734214R	GWHABKY00000004	3601047	0
SLAF464321F	GWHABKY00000004	40247814	3
SLAF464321R	GWHABKY00000004	40247814	0
SLAF142769F	GWHABKY00000004	492175882	16
SLAF142769R	GWHABKY00000004	492175882	0
SLAF751656F	GWHABKY00000004	48050245	23
SLAF751656R	GWHABKY00000004	48050545	23
SLAF569153F	GWHABKY00000004	14810964	42
SLAF569153R	GWHABKY00000004	14811289	42
SLAF157297F	GWHABKY00000005	56769513	5
SLAF157297R	GWHABKY00000005	56769228	2
SLAF372417F	GWHABKY00000005	249381799	2
SLAF372417R	GWHABKY00000005	249381799	0
SLAF149030F	GWHABKY00000005	466704919	1
SLAF149030R	GWHABKY00000005	466705298	6
SLAF107649F	GWHABKY00000006	101630142	0
SLAF107649R	GWHABKY00000006	101630142	0
SLAF47554F	GWHABKY00000006	341984409	0
SLAF47554R	GWHABKY00000006	341984409	0
SLAF113597F	GWHABKY00000006	510443835	0
SLAF113597R	GWHABKY00000006	510443835	0
SLAF99857F	GWHABKY00000006	80668460	1
SLAF99857R	GWHABKY00000006	80668803	2
SLAF535216F	GWHABKY00000006	53005182	2
SLAF535216R	GWHABKY00000006	53005182	0
SLAF171526F	GWHABKY00000006	475953514	2
SLAF171526R	GWHABKY00000006	475953514	0
SLAF129539F	GWHABKY00000006	103716187	0
SLAF129539R	GWHABKY00000006	103716482	0
SLAF596717F	GWHABKY00000006	574310940	0
SLAF596717R	GWHABKY00000006	574310940	0
SLAF324028F	GWHABKY00000007	495877151	2
SLAF324028R	GWHABKY00000007	495877151	0
SLAF296308F	GWHABKY00000007	277633402	0
SLAF296308R	GWHABKY00000007	277633402	0
SLAF582350F	GWHABKY00000007	283698634	2
SLAF582350R	GWHABKY00000007	283698634	0
SLAF3028F	GWHABKY00000007	717220651	0
SLAF3028R	GWHABKY00000007	717220651	0
SLAF28824F	GWHABKY00000007	428828041	18
SLAF28824R	GWHABKY00000007	428828041	0
SLAF148276F	GWHABKY00000007	220449592	0
SLAF148276R	GWHABKY00000007	220449592	0
SLAF202966F	GWHABKY00000007	88543438	0
SLAF202966R	GWHABKY00000007	88543438	0
SLAF85431F	GWHABKY00000007	142252218	2
SLAF85431R	GWHABKY00000007	142252218	0
SLAF105027F	GWHABKY00000007	716960172	0
SLAF105027R	GWHABKY00000007	716960172	0
SLAF523781F	GWHABKY00000007	701871467	0
SLAF523781R	GWHABKY00000007	701871467	0
SLAF1135197F	GWHABKY00000007	598568452	0
SLAF1135197R	GWHABKY00000007	598568452	0
SLAF436569F	GWHABKY00000007	62303662	0
SLAF436569R	GWHABKY00000007	62303662	0
SLAF565153F	GWHABKY00000007	191608027	0
SLAF565153R	GWHABKY00000007	191608027	0
