# Supplementary material for: Physical mapping of a new powdery mildew resistance locus from Thinopyrum ponticum chromosome 4AgS
Source: Front Plant Sci. 2023 Feb 23;14:1131205. doi: 10.3389/fpls.2023.1131205 (PMC9995812; doi:10.3389/fpls.2023.1131205)
Supplement: Supplementary file 2 [file Table_2.xlsx]

## Sheet: Sheet1
Supplementary Table 2 Alignment results of 78 SLAFs to Th. ponticum genome using Bowtie2
SLAFs	Chromosomes	Position (bp)	Mapping Qualities
SLAF28824F	LG12	153145816	2
SLAF28824R	LG12	153145816	0
SLAF1057219F	LG15	26263460	1
SLAF1057219R	LG15	26263460	0
SLAF119736F	LG19	449260830	0
SLAF119736R	LG19	449260830	0
SLAF262022F	LG25	147705404	32
SLAF262022R	LG25	147705742	36
SLAF149030F	LG28	500046606	1
SLAF149030R	LG28	500046227	6
SLAF66274F	LG31	39352120	1
SLAF66274R	LG31	39352469	1
SLAF24653F	LG31	8525705	1
SLAF24653R	LG31	8525341	1
SLAF140622F	LG31	22410078	1
SLAF140622R	LG31	22410436	1
SLAF633036F	LG31	26580668	5
SLAF633036R	LG31	26580668	0
SLAF30827F	LG32	8201550	1
SLAF30827R	LG32	8201892	1
SLAF142363F	LG32	7788983	42
SLAF142363R	LG32	7788687	6
SLAF134846F	LG32	12393230	1
SLAF134846R	LG32	12393230	0
SLAF824084F	LG32	47627858	1
SLAF824084R	LG32	47627508	30
SLAF435829F	LG32	17926514	1
SLAF435829R	LG32	17926876	1
SLAF1149712F	LG32	2804828	1
SLAF1149712R	LG32	2804828	0
SLAF137508F	LG32	15887210	31
SLAF137508R	LG32	15886860	0
SLAF114903F	LG33	23022329	1
SLAF114903R	LG33	23022027	1
SLAF89558F	LG33	40128884	2
SLAF89558R	LG33	40128884	0
SLAF112638F	LG33	35583428	18
SLAF112638R	LG33	35583058	32
SLAF613083F	LG33	33970915	1
SLAF613083R	LG33	33971279	1
SLAF1019025F	LG33	406232	26
SLAF1019025R	LG33	406232	0
SLAF932227F	LG33	38374660	42
SLAF932227R	LG33	38375014	26
SLAF675474F	LG34	15299178	1
SLAF675474R	LG34	15299178	0
SLAF35044F	LG34	19940762	1
SLAF35044R	LG34	19941113	1
SLAF988036F	LG34	24821628	42
SLAF988036R	LG34	24821985	1
SLAF167515F	LG34	29120837	1
SLAF167515R	LG34	29121140	1
SLAF94857F	LG34	34713260	1
SLAF94857R	LG34	34713603	1
SLAF54124F	LG34	38719705	30
SLAF54124R	LG34	38720053	6
SLAF722551F	LG34	50347683	6
SLAF722551R	LG34	50348017	6
SLAF464321F	LG34	56692492	6
SLAF464321R	LG34	56692829	6
SLAF60190F	LG34	57279313	6
SLAF60190R	LG34	57279662	6
SLAF222171F	LG34	71412070	31
SLAF222171R	LG34	71412433	32
SLAF494415F	LG34	71432520	42
SLAF494415R	LG34	71432891	35
SLAF719003F	LG34	72677805	42
SLAF719003R	LG34	72678137	30
SLAF852618F	LG34	79190510	32
SLAF852618R	LG34	79190842	6
SLAF94132F	LG34	83467211	7
SLAF94132R	LG34	83467541	26
SLAF256682F	LG34	83503370	42
SLAF256682R	LG34	83503705	42
SLAF171526F	LG34	83564180	37
SLAF171526R	LG34	83564535	6
SLAF596717F	LG34	83595675	31
SLAF596717R	LG34	83596013	42
SLAF513505F	LG34	84847753	6
SLAF513505R	LG34	84848096	35
SLAF342597F	LG34	86254440	42
SLAF342597R	LG34	86254767	1
SLAF326502F	LG34	92818641	42
SLAF326502R	LG34	92818976	42
SLAF185912F	LG34	96387849	42
SLAF185912R	LG34	96388189	36
SLAF372417F	LG34	97120500	1
SLAF372417R	LG34	97120854	6
SLAF227700F	LG34	104994235	6
SLAF227700R	LG34	104994585	1
SLAF582350F	LG34	106476325	42
SLAF582350R	LG34	106476670	1
SLAF107099F	LG34	107241306	1
SLAF107099R	LG34	107241658	1
SLAF324028F	LG34	111785425	6
SLAF324028R	LG34	111785776	1
SLAF688191F	LG34	116878760	1
SLAF688191R	LG34	116879099	31
SLAF296308F	LG34	152069993	6
SLAF296308R	LG34	152070346	6
SLAF313482F	LG34	158848199	1
SLAF313482R	LG34	158848535	6
SLAF759682F	LG34	189984200	6
SLAF759682R	LG34	189984560	1
SLAF292332F	LG34	201681962	1
SLAF292332R	LG34	201682327	1
SLAF434762F	LG34	204685981	1
SLAF434762R	LG34	204686262	6
SLAF690868F	LG34	380047740	6
SLAF690868R	LG34	380048085	1
SLAF140378F	LG34	423769920	6
SLAF140378R	LG34	423770233	6
SLAF84409F	LG35	33387493	1
SLAF84409R	LG35	33387139	39
SLAF107001F	LG35	57121506	6
SLAF107001R	LG35	57121836	32
SLAF733049F	LG35	10191466	31
SLAF733049R	LG35	10191107	6
SLAF735473F	LG35	10130550	42
SLAF735473R	LG35	10130903	25
SLAF495449F	LG35	53499090	1
SLAF495449R	LG35	53498723	1
SLAF593224F	LG36	34618829	26
SLAF593224R	LG36	34618489	0
SLAF816137F	LG36	8516769	1
SLAF816137R	LG36	8517143	1
SLAF247771F	LG37	8741381	32
SLAF247771R	LG37	8741042	39
SLAF105027F	LG38	7044073	0
SLAF105027R	LG38	7044073	0
SLAF523781F	LG38	2340341	6
SLAF523781R	LG38	2339976	6
SLAF535216F	LG38	36355283	35
SLAF535216R	LG38	36355698	6
SLAF88357F	LG40	20318106	1
SLAF88357R	LG40	20317774	6
SLAF130417F	LG40	71859252	1
SLAF130417R	LG40	71859586	1
SLAF242007F	LG40	8715661	40
SLAF242007R	LG40	8715304	40
SLAF161688F	LG40	10597642	1
SLAF161688R	LG40	10597328	1
SLAF144162F	LG40	70237468	1
SLAF144162R	LG40	70237832	1
SLAF1002610F	LG40	29860764	6
SLAF1002610R	LG40	29861130	0
SLAF45449F	LG49	165220033	17
SLAF45449R	LG49	165220033	0
SLAF141413F	LG59	341378290	6
SLAF141413R	LG59	341378643	30
SLAF85431F	LG61	34091062	2
SLAF85431R	LG61	34091062	0
SLAF142769F	LG63	29637197	0
SLAF142769R	LG63	29637197	0
SLAF142083F	LG69	475120903	1
SLAF142083R	LG69	475120905	1
