# Supplementary material for: Physical mapping of a new powdery mildew resistance locus from Thinopyrum ponticum chromosome 4AgS
Source: Front Plant Sci. 2023 Feb 23;14:1131205. doi: 10.3389/fpls.2023.1131205 (PMC9995812; doi:10.3389/fpls.2023.1131205)
Supplement: Supplementary file 3 [file Table_3.xlsx]

## Sheet: Sheet1
Supplementary Table 3 Alignment results of 113 specific markers to Th. ponticum chromosome LG34 using BLAST
Markers	Forward SLAFs	Identities (%)	Alignment lengths (bp)	Positions (bp)	Reverse SLAFs	Identities (%)	Alignment lengths (bp)	Positions (bp)
4Ag-312	SLAF75282F	99	100	175171	SLAF75282R	100	100	175517
4Ag-813	SLAF150265F	99	100	441808	SLAF150265R	100	100	442121
4Ag-1535	SLAF426606F	100	100	468043	SLAF426606R	100	100	467686
4Ag-39	SLAF53934F	100	100	1633772	SLAF53934R	100	97	1634099
4Ag-24	SLAF14091F	100	100	3616232	SLAF14091R	97	100	3616580
4Ag-37	SLAF11310F	99	100	3810861	SLAF11310R	96.91	97	3810497
4Ag-146	SLAF30827F	93.88	98	6358974	SLAF30827R	94.9	98	6358637
4Ag-815	SLAF142363F	98	100	8317004	SLAF142363R	93	100	8317301
4Ag-1140	SLAF439544F	96.94	98	8549936	SLAF439544R	97	100	8549579
4Ag-1486	SLAF741089F	98	100	8837689	SLAF741089R	91	100	8838052
4Ag-747	SLAF102396F	100	100	9476018	SLAF102396R	100	100	9475660
4Ag-121	SLAF24653F	99	100	9731077	SLAF24653R	98	100	9731435
4Ag-922	SLAF165213F	94.95	99	10548068	SLAF165213R	95	100	10548290
4Ag-156	SLAF55680F	98	100	10625342	SLAF55680R	95.96	99	10625695
4Ag-947	SLAF161688F	95.88	97	10641040	SLAF161688R	99	100	10640729
4Ag-941	SLAF150066F	99	100	15991765	SLAF150066R	97.94	97	15991452
4Ag-100	SLAF54282F	100	100	16046681	SLAF54282R	100	100	16047025
4Ag-253	SLAF35044F	100	100	19941212	SLAF35044R	100	100	19940861
4Ag-1134	SLAF423935F	100	100	20989197	SLAF423935R	100	100	20988868
4Ag-1419	SLAF988036F	100	100	24822084	SLAF988036R	99	100	24821727
4Ag-1122	SLAF140622F	99	100	24854308	SLAF140622R	99	100	24854661
4Ag-328	SLAF67275F	99	100	27552605	SLAF67275R	99	100	27552259
4Ag-553	SLAF78309F	100	100	27693707	SLAF78309R	98	100	27693359
4Ag-71	SLAF12567F	100	100	29045437	SLAF12567R	97	100	29045092
4Ag-193	SLAF64555F	100	100	29096187	SLAF64555R	97	100	29096562
4Ag-1446	SLAF167515F	99	100	29121239	SLAF167515R	100	100	29120936
4Ag-1146	SLAF166059F	97	100	29833122	SLAF166059R	98	100	29832793
4Ag-222	SLAF79404F	100	100	30112192	SLAF79404R	100	100	30111847
4Ag-1539	SLAF536380F	100	100	30316776	SLAF536380R	100	100	30317091
4Ag-1192	SLAF635042F	98	100	31248044	SLAF635042R	96.94	98	31248379
4Ag-896	SLAF153917F	98	100	31331170	SLAF153917R	98.97	97	31330861
4Ag-114	SLAF38711F	100	100	31585541	SLAF38711R	98	100	31585178
4Ag-202	SLAF39129F	95.1	102	31693851	SLAF39129R	97.94	97	31694218
4Ag-1873	SLAF569153F	99	100	33866976	SLAF569153R	99	100	33867312
4Ag-477	SLAF94857F	100	100	34713260	SLAF94857R	99	100	34713603
4Ag-1352	SLAF814136F	98.97	97	36432687	SLAF814136R	95	100	36432369
4Ag-297	SLAF38156F	99	100	36481525	SLAF38156R	100	100	36481867
4Ag-630	SLAF187641F	100	100	37413858	SLAF187641R	100	100	37413515
4Ag-79	SLAF54124F	100	100	38719705	SLAF54124R	100	100	38720053
4Ag-441	SLAF113597F	100	100	39743458	SLAF113597R	99	100	39743783
4Ag-407	SLAF113119F	100	100	42592845	SLAF113119R	99	100	42592477
4Ag-256	SLAF38323F	99	100	42665247	SLAF38323R	98.02	101	42665578
4Ag-488	SLAF54518F	100	100	43986249	SLAF54518R	100	100	43986592
4Ag-345	SLAF83670F	100	100	47628194	SLAF83670R	100	100	47627863
4Ag-605	SLAF194886F	100	100	47702089	SLAF194886R	96.15	104	47702448
4Ag-163	SLAF45108F	97	100	48410756	SLAF45108R	97	100	48410395
4Ag-1451	SLAF722551F	100	100	50347683	SLAF722551R	100	100	50348017
4Ag-1871	SLAF836971F	100	100	51602707	SLAF836971R	100	100	51602341
4Ag-1268	SLAF236065F	100	100	53982929	SLAF236065R	100	100	53983270
4Ag-144	SLAF84409F	100	100	54849692	SLAF84409R	98	100	54849339
4Ag-1890	SLAF500359F	100	100	55369856	SLAF500359R	100	100	55369508
4Ag-792	SLAF498363F	100	100	55859327	SLAF498363R	100	100	55859668
4Ag-1549	SLAF146905F	100	100	56251715	SLAF146905R	99	100	56252006
4Ag-1759	SLAF464321F	100	100	56692928	SLAF464321R	100	100	56692591
4Ag-910	SLAF263352F	100	100	56872633	SLAF263352R	100	100	56872343
4Ag-594	SLAF60190F	100	100	57279313	SLAF60190R	100	100	57279662
4Ag-825	SLAF122834F	98	100	59639459	SLAF122834R	100	100	59639120
4Ag-1853	SLAF751656F	100	100	61005209	SLAF751656R	99	100	61005509
4Ag-768	SLAF222171F	100	100	71412532	SLAF222171R	100	100	71412169
4Ag-769	SLAF494415F	100	100	71432990	SLAF494415R	100	100	71432619
4Ag-1339	SLAF719003F	100	100	72677805	SLAF719003R	100	100	72678137
4Ag-286	SLAF64278F	99	100	73307408	SLAF64278R	100	100	73307759
4Ag-639	SLAF99857F	99	100	74021446	SLAF99857R	100	100	74021806
4Ag-824	SLAF147895F	100	100	74347796	SLAF147895R	100	100	74348101
4Ag-421	SLAF218803F	100	100	74833251	SLAF218803R	94	100	74832914
4Ag-1789	SLAF894944F	100	100	74951459	SLAF894944R	100	100	74951167
4Ag-1425	SLAF144162F	100	100	75061175	SLAF144162R	100	100	75061538
4Ag-1921	SLAF495449F	100	100	75235630	SLAF495449R	99	100	75235263
4Ag-205	SLAF72728F	100	100	75338697	SLAF72728R	100	100	75339026
4Ag-1826	SLAF383170F	100	100	76764199	SLAF383170R	100	100	76763828
4Ag-580	SLAF130417F	100	100	77003605	SLAF130417R	100	100	77003943
4Ag-1852	SLAF511046F	100	100	78170252	SLAF511046R	100	100	78169896
4Ag-627	SLAF203039F	100	100	78844369	SLAF203039R	100	100	78844730
4Ag-1069	SLAF852618F	100	100	79190510	SLAF852618R	100	100	79190842
4Ag-588	SLAF107001F	98	100	79231118	SLAF107001R	96.94	98	79231451
4Ag-1820	SLAF308495F	100	100	80297019	SLAF308495R	100	100	80296654
4Ag-260	SLAF80309F	99	100	81697273	SLAF80309R	100	100	81696943
4Ag-428	SLAF94132F	98	100	83467211	SLAF94132R	99	100	83467541
4Ag-1108	SLAF256682F	100	100	83503370	SLAF256682R	100	100	83503705
4Ag-1782	SLAF596717F	100	100	83595675	SLAF596717R	100	100	83596013
4Ag-261	SLAF70892F	99	100	84553037	SLAF70892R	99	100	84552675
4Ag-1245	SLAF513505F	100	100	84848195	SLAF513505R	100	100	84847852
4Ag-1020	SLAF342597F	100	100	86254440	SLAF342597R	100	100	86254767
4Ag-1356	SLAF326502F	100	100	92819075	SLAF326502R	100	100	92818740
4Ag-1919	SLAF160016F	99	100	96073052	SLAF160016R	100	100	96072735
4Ag-1276	SLAF185912F	100	100	96387849	SLAF185912R	100	100	96388189
4Ag-1665	SLAF372417F	100	100	97120953	SLAF372417R	100	100	97120599
4Ag-725	SLAF111460F	99	100	101000401	SLAF111460R	100	100	101000732
4Ag-839	SLAF398804F	100	100	101074026	SLAF398804R	100	100	101073694
4Ag-995	SLAF572816F	100	100	101810750	SLAF572816R	100	100	101811115
4Ag-1832	SLAF227700F	100	100	104994235	SLAF227700R	100	100	104994585
4Ag-989	SLAF219141F	100	100	106196137	SLAF219141R	100	100	106196481
4Ag-1778	SLAF582350F	100	100	106476769	SLAF582350R	100	100	106476424
4Ag-523	SLAF107099F	99	100	107241306	SLAF107099R	100	100	107241658
4Ag-1413	SLAF324028F	100	100	111785875	SLAF324028R	100	100	111785524
4Ag-494	SLAF94313F	100	100	114091606	SLAF94313R	100	100	114091948
4Ag-391	SLAF47554F	99	100	117904317	SLAF47554R	100	100	117903965
4Ag-878	SLAF550829F	99	100	125967697	SLAF550829R	100	100	125967321
4Ag-447	SLAF110184F	99	100	129398814	SLAF110184R	99	100	129399149
4Ag-1287	SLAF170535F	100	100	130033050	SLAF170535R	100	100	130032683
4Ag-196	SLAF50940F	99	100	132715473	SLAF50940R	98	100	132715121
4Ag-1450	SLAF224761F	100	100	133332205	SLAF224761R	100	100	133331829
4Ag-1169	SLAF571591F	100	100	137610305	SLAF571591R	100	100	137610671
4Ag-844	SLAF529986F	100	100	145200742	SLAF529986R	100	100	145200397
4Ag-1626	SLAF296308F	100	100	152069993	SLAF296308R	100	100	152070346
4Ag-1398	SLAF930994F	100	100	152966236	SLAF930994R	100	100	152966581
4Ag-1547	SLAF459388F	100	100	166672490	SLAF459388R	100	100	166672139
4Ag-1903	SLAF325453F	100	100	195094698	SLAF325453R	100	100	195095060
4Ag-1039	SLAF292332F	100	100	201681962	SLAF292332R	100	100	201682327
4Ag-840	SLAF434762F	100	100	204685981	SLAF434762R	100	100	204686262
4Ag-452	SLAF129005F	92	100	315900758	SLAF129005R	91.1	101	315901074
4Ag-1475	SLAF690868F	100	100	380048184	SLAF690868R	100	100	380047839
4Ag-1051	SLAF140378F	100	100	423769920	SLAF140378R	100	100	423770233
