# Supplementary material for: Physical mapping of a new powdery mildew resistance locus from Thinopyrum ponticum chromosome 4AgS
Source: Front Plant Sci. 2023 Feb 23;14:1131205. doi: 10.3389/fpls.2023.1131205 (PMC9995812; doi:10.3389/fpls.2023.1131205)
Supplement: Supplementary file 4 [file Table_4.xlsx]

## Sheet: Sheet1
Supplementary Table 4 Alignment results of SLAFs and amplification products on chromosomes LG34 and 4E
Markers	Positions of SLAFs on LG34 (Mb)	Positions of amplification products on LG34 (Mb)	Positions of amplification products on 4E (Mb)	Indentities (%)
4Ag-312	0.18	0.18	8.3	97.34
4Ag-24	3.62	3.79	6.55	36.5
4Ag-747	9.48	9.48	603.08	27.75
4Ag-100	16.05	16.05	0.51	93.81
4Ag-1134	20.99	20.99	-	-
4Ag-1122	24.85	24.85	-	-
4Ag-1446	29.12	29.16	13.64	41.3
4Ag-1873	33.87	33.87	14.81	93.23
4Ag-79	38.72	38.76	85.33	74.07
4Ag-488	43.99	43.99	-	-
4Ag-345	47.63	47.72	606.15	20.85
4Ag-1451	50.35	50.35	32.42	61.44
4Ag-1268	53.98	53.98	35.54	44.27
4Ag-1759	56.69	56.69	40.25	92.17
4Ag-769	71.43	71.43	60.15	88.91
4Ag-1789	74.95	74.95	-	-
4Ag-1820	80.3	80.3	15.02	19.43
4Ag-1356	92.82	92.82	21.28	69.57
4Ag-1665	97.12	97.12	111.45	67.97
4Ag-839	101.07	101.07	104.84	91.2
4Ag-989	106.2	106.2	48.54	47.28
4Ag-1413	111.79	111.79	28.87	66.74
4Ag-494	114.09	113.72	119.81	94.75
4Ag-878	125.97	125.97	537.46	65.84
4Ag-1287	130.03	130.03	144.59	85.32
4Ag-1169	137.61	137.61	-	-
4Ag-844	145.2	145.2	470.64	84.77
4Ag-1626	152.07	152.07	4.51	63.18
4Ag-1547	166.67	166.67	209.11	60.22
4Ag-1903	195.09	195.09	262.09	46.71
4Ag-840	204.69	204.69	2.57	81.63
Annotation: "-" shows no data.
