# Supplementary material for: Physical mapping of a new powdery mildew resistance locus from Thinopyrum ponticum chromosome 4AgS
Source: Front Plant Sci. 2023 Feb 23;14:1131205. doi: 10.3389/fpls.2023.1131205 (PMC9995812; doi:10.3389/fpls.2023.1131205)
Supplement: Supplementary file 5 [file Table_5.xlsx]

## Sheet: Sheet1
Supplementary Table 5 Agronomic performance of L1, WTT139, WTT146, WTT323 and Xiaoyan 81 during the four consecutive seasons of 2018-2022
Years	Sites	Lines	PH (cm)	ETN	KNMS	TKN	TKW (g)	YPP (g)
2018-2019	Nanpi Hebei	WTT146	58.70±3.23	14.20±6.69	51.40±10.83	335.00±81.93	29.19±1.42	9.75±2.43
		Xiaoyan 81	70.66±1.38**	10.20±0.84	60.80±8.04	401.80±53	38.61±1.94**	15.48±1.76**
2019-2020		WTT146	64.40±1.98	11.40±2.88	60.00±11.73**	393.00±101.16	30.52±1.23	12.04±3.35
		Xiaoyan 81	74.90±3.75**	15.80±2.05*	45.40±6.80	478.80±65.35	37.43±0.79**	17.95±2.77**
2020-2021	Changping Beijing	WTT139	90.50±2.45a	12.40±2.30ab	46.00±3.32ab	426.00±67.83b	45.18±1.78a	19.23±3.14b
		WTT323	59.50±2.42c	15.00±3.08a	43.00±4.74ab	206.80±13.42c	34.85±2.95c	7.23±0.98c
		L1	58.10±3.38c	9.60±1.52b	38.20±7.82b	278.20±63.53c	30.28±3.08d	8.47±2.45c
		Xiaoyan 81	75.50±2.60b	15.20±3.56a	50.20±9.26a	619.00±145.48a	38.68±2.50b	23.71±4.42a
2021-2022	Changping Beijing	WTT139	78.74±3.03a	10.60±1.82a	57.00±9.90a	377.20±49.47a	45.79±1.64a	17.26±2.23a
		WTT323	62.96±3.99b	16.00±4.69a	59.80±12.91a	504.80±233.52a	35.75±1.27b	18.16±8.67a
		L1	51.88±9.36c	14.20±6.76a	61.00±10.46a	388.80±260.77a	33.39±3.66b	13.64±11.15a
		Xiaoyan 81	59.74±1.77b	15.40±1.34a	57.60±7.54a	584.60±25.41a	35.95±1.11b	21.02±1.27a
Annotation: * was determined by the Student's t test at P＜0.05, ** was determined by the Student's t test at P＜0.01. For a specific trait within each row, the values followed by the same letters were not different significantly at the 0.05 probability level. PH, plant height; ETN, effective tiller number; KNMS, kernel number per main spike; TKN, total kernel number; TKW, thousand-kernel weight; Y…
