# Supplementary material for: Physical mapping of a new powdery mildew resistance locus from Thinopyrum ponticum chromosome 4AgS
Source: Front Plant Sci. 2023 Feb 23;14:1131205. doi: 10.3389/fpls.2023.1131205 (PMC9995812; doi:10.3389/fpls.2023.1131205)
Supplement: Supplementary file 6 [file Table_6.xlsx]

## Sheet: Sheet1
Supplementary Table 6 Agronomic performance of J146 and Jimai 22 during the seasons of 2021-2022
Lines	PH (cm)	ETN	KNMS	TKN	TKW (g)	YPP (g)
J146	57.54±4.67	13.40±3.51	58.00±6.93	543±148.15**	33.01±1.84**	17.79±4.28
Jimai 22	54.34±1.75	12.80±2.77	51.80±4.38	387±66.47	44.63±2.42	17.20±2.53
Annotation: * was determined by the Student's t test at P＜0.05, ** was determined by the Student's t test at P＜0.01. PH, plant height; ETN, effective tiller number; KNMS, kernel number per main spike; TKN, total kernel number; TKW, thousand-kernel weight; YPP, yield per plant.
